# Supplementary material
Source: publisher site journal article supplement (https://www.e-cmh.org/upload/media/cmh-2023-0057-Supplementary-Table-3.pdf)
Supplement: Supplementary file 1 [file cmh-2023-0057-Supplementary-Table-3.pdf]

**Supplementary Table 3.** Treatment responses of DLBCL before and after IPTW

| Variables                      | Before IPTW      |                       | After IPTW       |                       | P-value |
|--------------------------------|------------------|-----------------------|------------------|-----------------------|---------|
|                                | CHB group (n=82) | Non-CHB group (n=846) | CHB group (n=82) | Non-CHB group (n=846) |         |
| Best response, N (%)           |                  |                       |                  |                       | 0.02    |
| CR                             | 71 (86.6%)       | 731 (86.4%)           | 71 (86.6%)       | 713 (84.3%)           | 0.03    |
| PR                             | 4 (4.9%)         | 39 (4.6%)             | 4 (4.9%)         | 55 (6.5%)             |         |
| SD                             | 0 (0.0%)         | 5 (0.6%)              | 0 (0.0%)         | 11 (1.3%)             |         |
| PD                             | 1 (1.2%)         | 50 (5.9%)             | 1 (1.2%)         | 47 (5.5%)             |         |
| Not evaluable                  | 6 (7.3%)         | 21 (2.5%)             | 6 (7.3%)         | 20 (2.4%)             |         |
| Objective response rate, N (%) |                  |                       |                  |                       | 1.00    |
| CR+PR                          | 75 (91.5%)       | 770 (91.0%)           | 75 (91.5%)       | 770 (91.0%)           | 0.85    |
| Disease control rate, N (%)    |                  |                       |                  |                       |         |
| CR+PR+SD                       | 75 (91.5%)       | 775 (91.6%)           | 75 (91.5%)       | 775 (91.6%)           | 0.85    |

CHB, chronic hepatitis B; CR, complete remission; DLBCL, diffuse large B-cell lymphoma; IPTW, inverse probability of treatment weighting; PR, partial response; PD, progressive disease; SD, stable disease.
